# Supplementary material for: Synthesis and electron transporting properties of methanofullerene-o-carborane dyads in organic field-effect transistors
Source: Royal Society of Chemistry journal article supplement (doi:10.1039/c3dt50509j), 2013-01-01
Supplement: c3dt50509j.pdf [file c3dt50509j.pdf]

## Supporting Information

### Synthesis and Electron Transporting Properties of Methanofullerene-*o*-Carborane Dyads in Organic Field-Effect Transistors

*Maengsun Eo,<sup>a</sup> Hye Jin Bae,<sup>a</sup> Minsaeng Hong,<sup>c</sup> Youngkyu Do<sup>a,\*</sup> Shinuk Cho,<sup>b,\*</sup> and Min Hyung Lee<sup>c,\*</sup>*

<sup>a</sup> Department of Chemistry, KAIST, Daejeon 305–701, Republic of Korea. <sup>b</sup> Department of Physics and EHSRC, University of Ulsan, Ulsan 680–749, Republic of Korea <sup>c</sup> Department of Chemistry and EHSRC, University of Ulsan, Ulsan 680–749, Republic of Korea

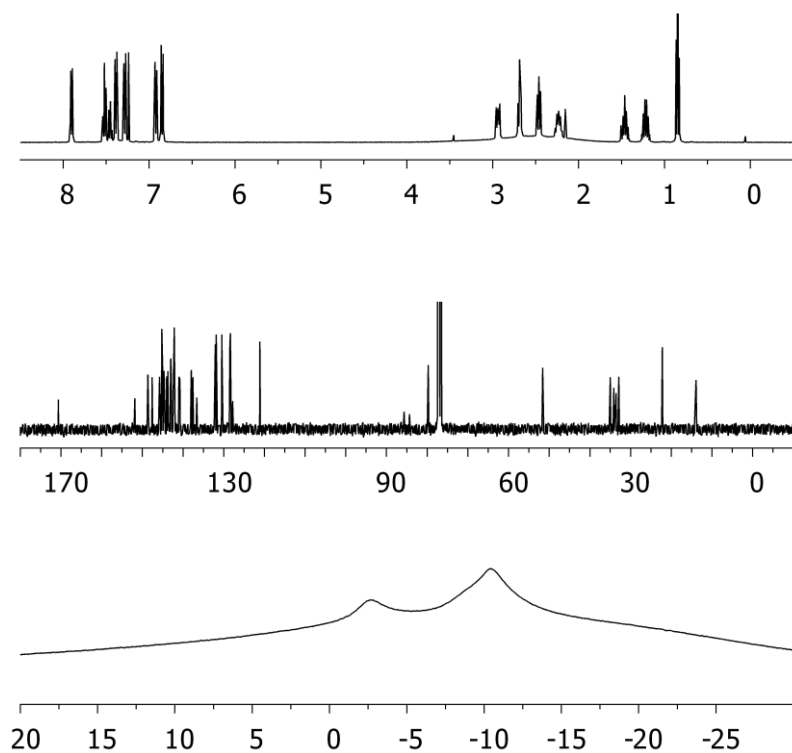

**Figure S1.**  $^1\text{H}$  (top),  $^{13}\text{C}$  (middle) and  $^{11}\text{B}$  (bottom) NMR spectra of **PCB-Ph-CB**.

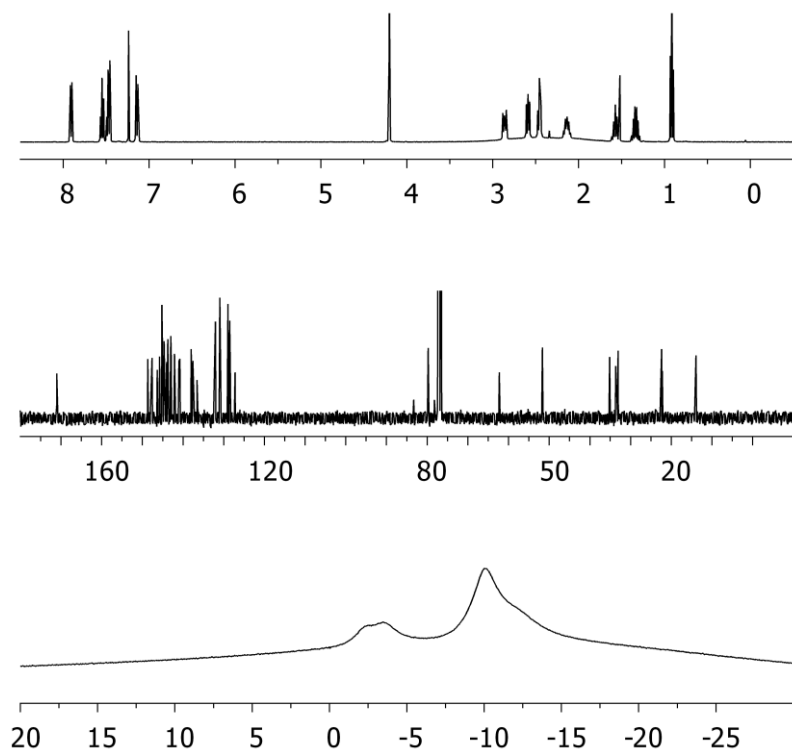

**Figure S2.**  $^1\text{H}$  (top),  $^{13}\text{C}$  (middle) and  $^{11}\text{B}$  (bottom) NMR spectra of **PCB-C1-CB**.

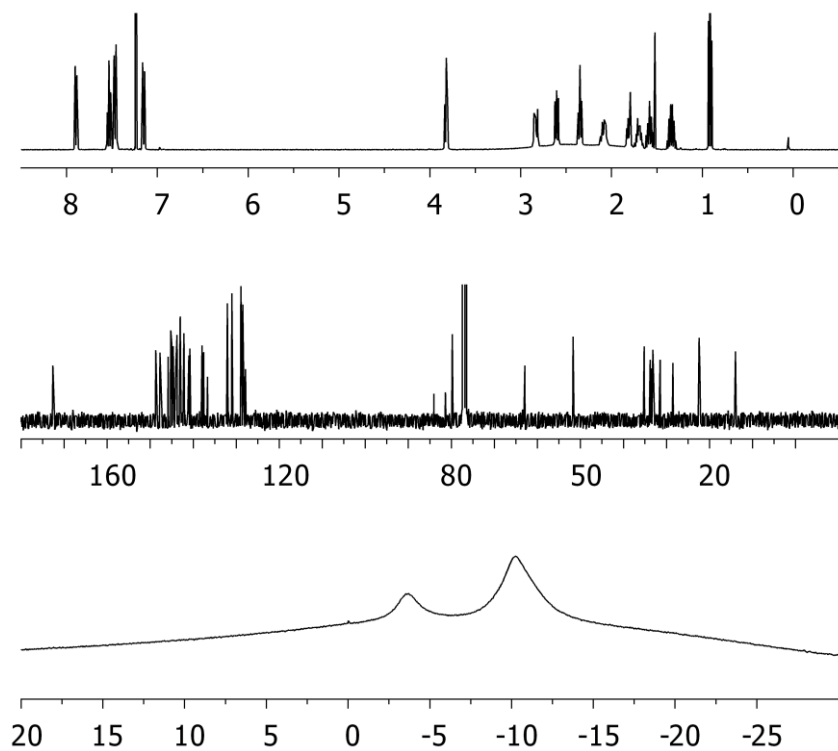

**Figure S3.**  $^1\text{H}$  (top),  $^{13}\text{C}$  (middle) and  $^{11}\text{B}$  (bottom) NMR spectra of PCB-C3-CB.

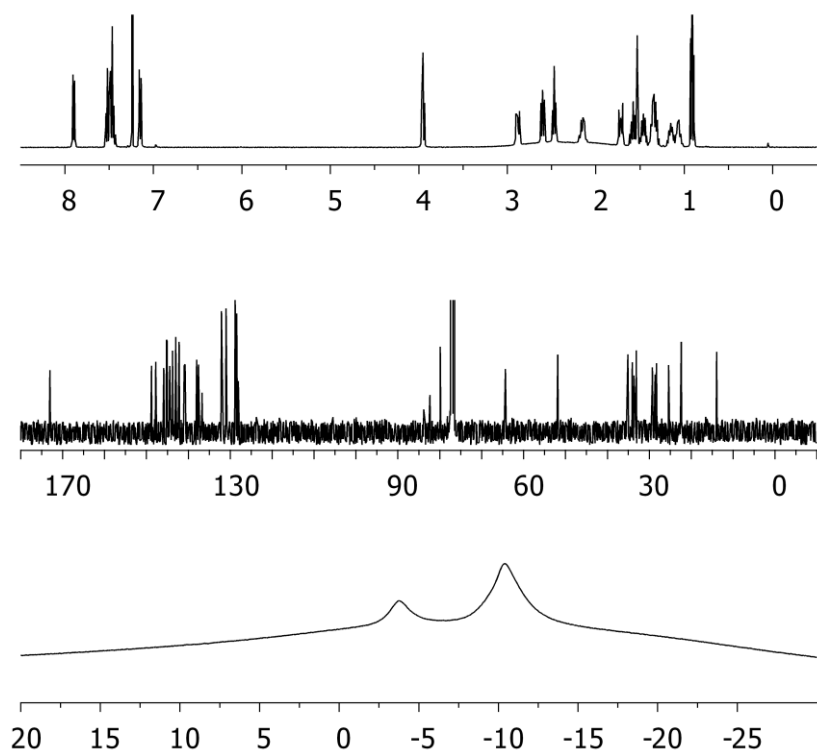

**Figure S4.**  $^1\text{H}$  (top),  $^{13}\text{C}$  (middle) and  $^{11}\text{B}$  (bottom) NMR spectra of PCB-C6-CB.

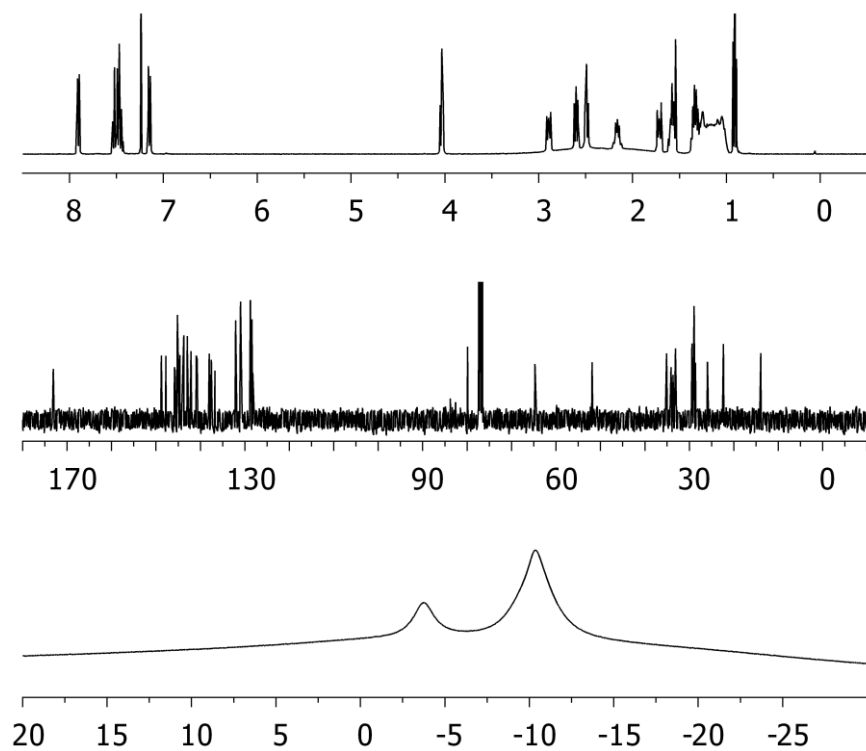

**Figure S5.**  $^1\text{H}$  (top),  $^{13}\text{C}$  (middle) and  $^{11}\text{B}$  (bottom) NMR spectra of PCB-C11-CB.

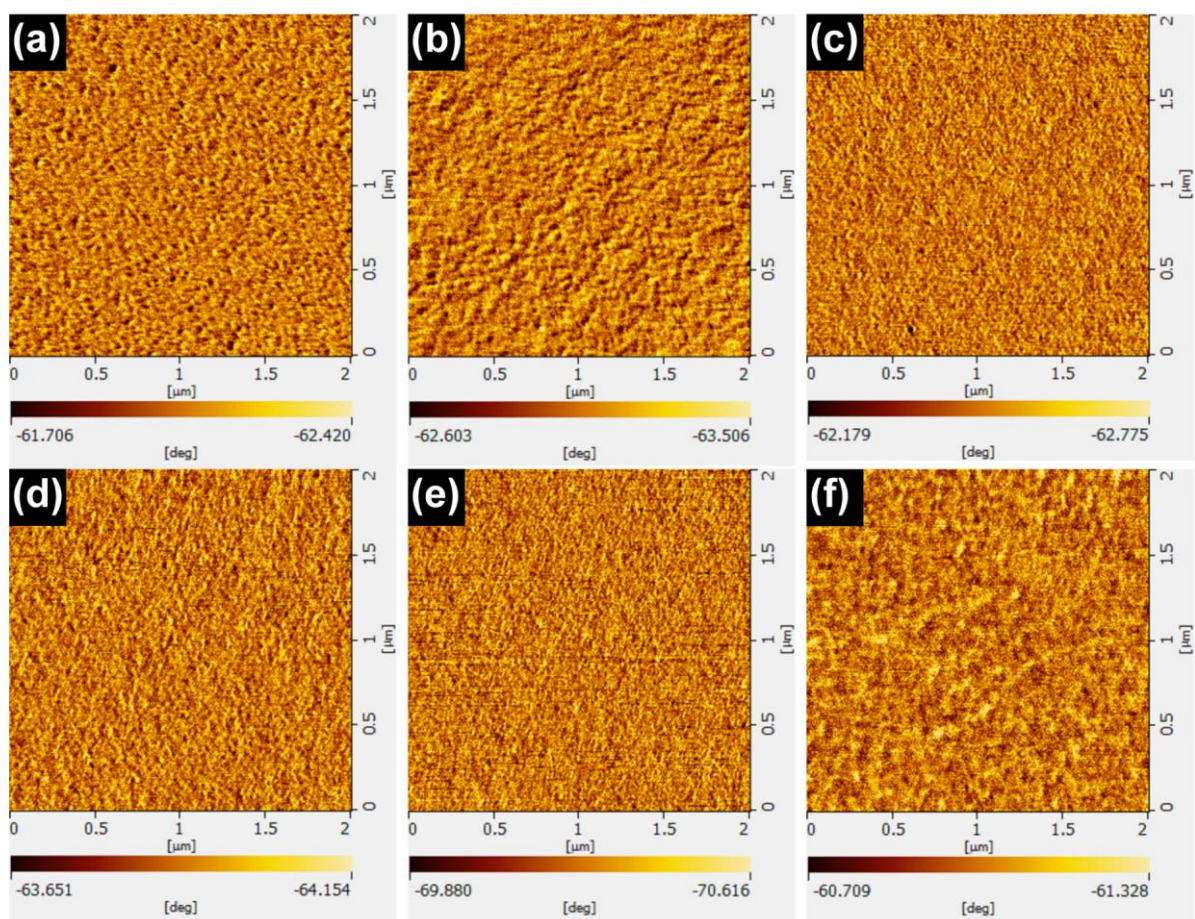

**Figure S6.** AFM phase images of thin films of (a) **PCB-Ph-CB**, (b) **PCB-C1-CB**, (c) **PCB-C3-CB**, (d) **PCB-C6-CB**, (e) **PCB-C11-CB**, and (f) physical blend of PCBM and 1-(4-*n*-BuC<sub>6</sub>H<sub>4</sub>)-2-Me-1,2-*closo*-C<sub>2</sub>B<sub>10</sub>H<sub>10</sub>.
